1 **The five *Urochloa* spp. used in development of tropical forage cultivars originate from**  
2 **defined subpopulations with differentiated gene pools**

3

4 J Higgins<sup>1</sup>, P Tomaszewska<sup>2</sup>, TK Pellny<sup>3</sup>, V Castiblanco<sup>4</sup>, J Arango<sup>4</sup>, J Tohme<sup>4</sup>, T  
5 Schwarzacher<sup>2</sup>, RA Mitchell<sup>3</sup>, JS Heslop-Harrison<sup>2</sup>, JJ De Vega<sup>1</sup>

6

7 1 Earlham Institute, Norwich Research Park, Norwich NR4 7UZ, UK.

8 2 Department of Genetics and Genome Biology, University of Leicester, Leicester LE1 7RH,  
9 UK.

10 3 Rothamsted Research, Harpenden, Hertfordshire AL5 2JQ, UK.

11 4 International Center for Tropical Agriculture (CIAT), 6713 Cali, Colombia.

12

13 **HIGHLIGHT**

14 We clarified the genetic make-up and population structure of 111 *Urochloa* spp. forage  
15 grasses to inform cultivar development.

16

17 **ABSTRACT**

18 *Background and Aims*

19 *Urochloa* (syn. *Brachiaria*, and including some *Panicum* and *Megathyrus*) is a genus of tropical  
20 and subtropical grasses widely sown as forage to feed ruminants in the tropics. A better  
21 understanding of the diversity among *Urochloa* spp. allow us to leverage its varying ploidy  
22 levels and genome composition to accelerate its improvement, following the example from  
23 other crop genera.

24 *Methods*

25 We explored the genetic make-up and population structure in 111 accessions, which comprise  
26 the five *Urochloa* species used for the development of commercial cultivars. These accessions  
27 are conserved from wild materials from collection sites at their centre of origin in Africa. We  
28 used RNA-seq, averaging 40M reads per accession, to generate 1,167,542 stringently

29 selected SNP markers that tentatively encompassed the complete *Urochloa* gene pool used  
30 in breeding.

### 31 *Key Results*

32 We identified ten subpopulations, which had no relation with geographical origin and  
33 represented ten independent gene pools, and two groups of admixed accessions. Our results  
34 support a division in *U. decumbens* by ploidy, with a diploid subpopulation closely related to  
35 *U. ruzizensis*, and a tetraploid subpopulation closely related to *U. brizantha*. We observed  
36 highly differentiated gene pools in *U. brizantha*, which were not related with origin or ploidy.  
37 Particularly, one *U. brizantha* subpopulation clustered distant from the other *U. brizantha* and  
38 *U. decumbens* subpopulations, so likely containing unexplored alleles. We also identified a  
39 well-supported subpopulation containing both polyploid *U. decumbens* and *U. brizantha*  
40 accessions; this was the only group containing more than one species and tentatively  
41 constitutes an independent “mixed” gene pool for both species. We observed two gene pools  
42 in *U. humidicola*. One subpopulation, “humidicola-2”, was much less common but likely  
43 includes the only known sexual accession in the species.

### 44 *Conclusions*

45 Our results offered a definitive picture of the available diversity in *Urochloa* to inform breeding  
46 and resolve questions raised by previous studies. It also allowed us identifying prospective  
47 founders to enrich the breeding gene pool and to develop genotyping and genotype-  
48 phenotype association mapping experiments.

49

50 **Keywords:** Brachiaria, grassland, breeding, forage, RNA-seq, population structure,

51 Poaceae

52 **INTRODUCTION**

53 *Urochloa* (syn. *Brachiaria*, and including some *Panicum* and *Megathyrus*) is a genus of tropical  
54 and subtropical grasses widely sown as forage to feed ruminants in the American and African  
55 tropics, particularly in areas with marginal soils. *Urochloa* grasses exhibit good resilience and  
56 low nutritional needs (Miles, 2007, Gracindo et al., 2014, Maass et al., 2015). Five species, *U.*  
57 *ruziziensis*, *U. decumbens*, *U. brizantha*, *U. humidicola*, and *U. maxima* are broadly used as  
58 fodder plants, covering over 100M hectares in Brazil alone. Such an enormous area, about  
59 half that of each of the most widely grown cereals, wheat or maize, has a huge environmental  
60 impact in terms of displacement of native species, water usage, and provision of ecosystem  
61 services. In addition to extensive pasture systems in Latin America, *Urochloa* is also planted  
62 in intensive smallholder systems in Africa and Asia (Keller-Grein et al., 1996, Maass et al.,  
63 2015). Breeding programmes in different countries have exploited the diversity among  
64 *Urochloa* spp. for the development of commercial forage cultivars by recurrent selection over  
65 many years (Jank et al., 2014, Tsuruta et al., 2015, Worthington and Miles, 2015).

66  
67 The genus *Urochloa* includes species previously classified under *Brachiaria*, *Megathyrus*,  
68 *Eriochloa* and *Panicum* (Torres González and Morton, 2005, Kellogg, 2015). Joint missions  
69 between 1984 and 1985 conducted by the CGIAR (Consultative Group on International  
70 Agricultural Research) centres in several African countries collected wild materials from the  
71 species in the genus, mostly as live plant cuttings or ramets (Keller-Grein et al., 1996). These  
72 activities built a global grass collection with ~ 700 *Urochloa* accessions that are held at CIAT  
73 (Centro Internacional de Agricultura Tropical), ILRI (International Livestock Research  
74 Institute), and EMBRAPA (Brazilian Agricultural Research Corporation).

75  
76 Three *Urochloa* species (*U. brizantha*, *U. decumbens*, and *U. ruziziensis*) have been arranged  
77 in an agamic (apomictic) group or complex (Do Valle and Savidan, 1996, Renvoize et al.,  
78 1996, Ferreira et al., 2016, Triviño et al., 2017). Crosses between ~ 10 founders from these  
79 three species were completed in the late 1980s and their progeny constitutes the basis of the

80 current recurrent selection breeding programmes at CIAT and EMBRAPA (Miles et al., 2006).  
81 On the other hand, *U. humidicola* and *U. dictyoneura* have been arranged in the “humidicola  
82 complex” (Lutts et al., 1991, Renvoize et al., 1996, Triviño et al., 2017). More recently,  
83 independent *U. humidicola* breeding programs have also been established at CIAT and  
84 EMBRAPA after the discovery in the mid-2000s of a natural sexual polyploid germplasm  
85 accession that could be crossed with other apomictic polyploid *U. humidicola* pollen donors  
86 (Jungmann et al., 2010, Vigna et al., 2011a).

87

88 *Urochloa* spp. show varying ploidy levels and sub-genome compositions (Do Valle and  
89 Savidan, 1996, Keller-Grein et al., 1996, Tomaszewska et al., 2021b, Tomaszewska et al.,  
90 2021a), which likely result in a highly diverse gene pool that can be leveraged for continued  
91 improvement through breeding. Exploiting sub-genome variability among species and ploidy  
92 levels has been highly successful in the improvement of other crop tribes, such as Triticeae  
93 and Brassicaceae (Gale and Miller, 1987, Burton et al., 2004, Ali et al., 2016). However,  
94 genetic composition and relationships in *Urochloa* are poorly understood; studies from  
95 countries with active *Urochloa* breeding programmes have explored the phylogeny in these  
96 species to inform breeding, but projects leveraged of a limited number of markers, such as  
97 ITS, RAPD, SSR, ISSR, and microsatellites (Torres González and Morton, 2005, Jungmann  
98 et al., 2010, Vigna et al., 2011a, Vigna et al., 2011b, Ferreira et al., 2016, Triviño et al., 2017)

99

100 *Urochloa* spp. with apomictic or mixed reproduction have particularly resulted in odd levels of  
101 ploidy and contribute to increased intraspecific variability. Polyploidy has many benefits for  
102 plants, namely heterosis, gene redundancy, and loss of self-incompatibility and gain of  
103 asexual reproduction. In a recent work (Tomaszewska et al., 2021b), we used flow cytometry  
104 to determine the ploidy of over 350 *Urochloa* accessions from these collections and propose  
105 an evolutionary model. This work extended and corrected some previous studies (Penteado  
106 et al., 2000, Mendes-Bonato et al., 2002). We also concluded ploidy was not related to  
107 geographical origin, which agrees with previous results (Jungmann et al., 2010, Vigna et al.,

108 2011a, Vigna et al., 2011b, Triviño et al., 2017). In another recent work (Worthington et al.,  
109 2021), we have made available a genome assembly and gene annotation of a diploid  
110 accession of *U. ruziziensis* (GCA\_003016355), which has allowed a greater use of genomics  
111 to characterise these materials. For example, we identified loss-of-function (LOF) genes  
112 related to forage quality and environmental impact using allele mining (Hanley et al., 2020).

113

114 Here, we have characterised the genetic make-up and population structure of 111 accessions,  
115 which are representative of the collections of wild materials in Africa in 1984 and 1985. These  
116 111 accessions belong to the five *Urochloa* spp. that are used in the development of  
117 commercial forage cultivars. We used RNA-seq from total RNA, so tentatively encompassing  
118 the complete *Urochloa* gene pool used in breeding to obtain a definitive picture of the available  
119 diversity, resolve questions raised by previous studies, and identify prospective founders to  
120 improve the breeding gene pool.

121

## 122 **METHODS**

### 123 **RNA extraction and sequencing**

124 We sequenced 111 accessions from five *Urochloa* (syn. *Brachiaria*) species. 104 accessions  
125 were sampled at the single time from the *in-situ* field collection maintained by the Genebank  
126 at the International Center for Tropical Agriculture (CIAT) in Cali, Colombia. Accessions  
127 sourced from CIAT are named as e.g. “CIAT 26146”, but we have removed “CIAT” from our  
128 text. Fresh leaf material was collected and immediately frozen in liquid nitrogen. Samples were  
129 ground in liquid nitrogen and lyophilised. Total RNA was extracted as described in Hanley et  
130 al. (2020) with the difference that prior to DNase treatment the pellets were dried in a rotary  
131 evaporator (Eppendorf, USA) and stored at room temperature. Another seven accessions  
132 were obtained from the United States Department of Agriculture (USDA, GA, USA) as seeds.  
133 These seven accessions include “PI” at the beginning of their ID. These seven accessions  
134 were sampled at a different time than the other accessions after growing in glasshouses at  
135 University of Leicester, UK. We generated one single sample from each accession, and we

136 use “sample” and “accessions” as synonyms in our case through the text. For all samples,  
137 Illumina sequencing using standard RNA-seq library preparations with 150 bp paired reads  
138 was conducted by Novogene Europe (Cambridge, UK). The raw reads were deposited in SRA  
139 under Bioproject PRJNA513453.

140

#### 141 **Read alignment and SNP calling**

142 Raw reads were pre-processed using Trim galore v. 0.5 (Krueger, 2015) with the options for  
143 Illumina paired reads and trimming 13 bps at the 5' end in both reads. Processed reads were  
144 aligned to the available *Urochloa* genome (Worthington et al., 2021), which corresponded to  
145 a *U. ruziziensis* accession. RNA to DNA alignments were done using STAR v. 2.6.0c (Dobin  
146 et al., 2013) with a minimum overlap of 30 % and a maximum mismatch of 3 bp per alignment,  
147 in order to allow for mapping from more distant species to the genome. Alignment coverage  
148 was calculated using BEDTools genomecov. SNP calling was done using GATK v. 3.7.0 and  
149 the recommended pipeline for RNA-seq (Van der Auwera et al., 2013). Firstly, we used  
150 PicardTools v. 2.1.1 to annotated duplicate reads using the option MarkDuplicates. Later, we  
151 used GATK's tool SplitNCigarReads with the options “-rf ReassignOneMappingQuality -RMQF  
152 255 -RMQT 60 -U ALLOW\_N\_CIGAR\_READS” to reformat some alignments that span introns  
153 to match conventions for the final step. The final step was SNP calling using GATK's tool  
154 HaplotypeCaller with all the samples at the same time (multisample mode). SNP calling was  
155 run with the options “-ploidy 6 -dontUseSoftClippedBases -stand\_call\_conf 20 -  
156 maxNumHaplotypesInPopulation 128” to obtain a good quality calling from RNA alignments.  
157 GATK identified 6,461,493 variants, which included 5,757,116 SNPs. These were filtered for  
158 a minimal allele frequency (MAF) of 1% to give a set of 4,722,195 SNPs. Sites with a depth of  
159 lower than 5 were set to missing, then sites with more than 40% missing data were removed  
160 to give a final set of 1,167,542 SNPs. Two additional subsets were obtained by filtering out  
161 either the 67 samples (895,667 SNPs) in the agamic group or the *U. humidicola* samples  
162 (512,611 SNPs). These subsets were filtered for MAF of 1%.

163

## 164 **Population analysis**

165 Population structure analysis was performed through ADMIXTURE (Alexander and Lange,  
166 2011) using  $K = 3$  to  $K = 10$  for the 111 samples,  $K = 2$  to  $K = 8$  for the 67 samples and  $K = 2$   
167 to  $K = 8$  for the 28 samples. Each value of  $K$  was run 10 times, the cross-validation error was  
168 averaged over the 10 runs. The 10 output files were combined using CLUMPP within the R  
169 package POPHELPER v.2.2.7 (Francis, 2017). The PCA (principal component analysis) was  
170 carried out using Tassel v5.2.41 (Bradbury et al., 2007).

171

## 172 **RESULTS**

173

### 174 **Sequencing, aligning and SNP calling in a panel of *Urochloa* accessions from five** 175 **species**

176 We sequenced 111 accessions from five *Urochloa* (syn. *Brachiaria*) species: *U. ruziziensis*,  
177 *U. brizantha*, *U. decumbens*, *U. humidicola* and *U. maxima* (syn. *Megathyrsus maximus*).  
178 Species identity and ploidy were previously determined using plant architecture traits and flow  
179 cytometry of fluorescently stained nuclei (Tomaszewska et al., 2021a, Tomaszewska et al.,  
180 2021b). The country of origin of 92 accessions was known and for 75 accessions we also  
181 knew the collection coordinates (Fig. 1). Accessions were collected in a broad range of  
182 latitudes (20.08S to 11.37N) but not of longitudes (26.98E to 42.05E), except for one *U.*  
183 *brizantha* accession from Cameroon. Annotations were summarised in Table 1 and detailed  
184 in Suppl. Table 1.

185

186 Samples were aligned to the available *Urochloa* genome assembly and annotation  
187 (Worthington et al., 2021), which corresponds to a diploid *U. ruziziensis* sample. Two well-  
188 defined groups of species were observed based on aligning metrics (Fig. 2); over 70 % of the  
189 reads from *U. ruziziensis*, *U. decumbens* and *U. brizantha* (all but one) accessions had more  
190 than 70 % of reads that aligned in the reference genome once (uniquely-mapping reads). On  
191 the contrary, accessions from *U. maxima* and *U. humidicola* showed a percentage of uniquely-

192 mapping reads under 70 % (Fig. 2A). The grouping was correlated to the genetic distance to  
193 the reference genome (reference bias).

194

195 The percentage of reads mapping in multiple loci (multi-mapping reads) increased with ploidy  
196 (Fig. 2B) for the group of the accessions belonging to the species *U. ruziziensis*, *U.*  
197 *decumbens* and *U. brizantha*; diploids had a percentage of multi-mapping reads under 5 %,  
198 while it was over 5 % in most polyploid accessions. However, the percentage of multi-mapping  
199 reads in the other species, which are more distant species to the reference, was directly  
200 proportional to the total number of mapped reads (Fig. 2B), i.e. independent of ploidy.

201

202 RNA-seq reads covered 268.84 Mbps (~36.7 % of the 732.5 Mbps genome assembly). The  
203 covered regions are more than 2.5 times the original gene annotation from the *U. ruziziensis*  
204 genome (43,152 genes comprising 102 Mbps). The median read coverage was 25 reads in  
205 the covered regions, and the average read coverage in these regions was  $2587 \pm 54293$   
206 reads. After SNP calling and filtering, the average SNP density in the genome was 7.3  
207 SNPs/Kbp, or 17.9 SNPs/Kbp if only considering the read covered part of the genome. Using  
208 the 43,152 genes and 202,681 exons annotated in the genome reference, the median was 69  
209 and 13 SNPs in each gene and exon (average was 95 and 36 per gene and exon,  
210 respectively). 34,981 of the annotated genes had at least one SNP.

211

## 212 **Admixture analysis**

213 We employed genetic admixture analysis for defining subpopulations. To assign 111 *Urochloa*  
214 accessions to subpopulations, the admixture (Fig. 3) and principal component (Fig. 4) analysis  
215 were considered together. The “admixture model” assumes that each individual has ancestry  
216 from one or more of “K” genetically distinct sources. An estimation of four subpopulations  
217 (K = 4) was selected based on the CV error (Suppl. Fig. 1A) and population structure (Fig. 4).  
218 A minimum threshold of 50% genetic composition was used to assign accessions to groups.  
219 This allowed us to place the accessions in four groups (Fig. 3): *U. humidicola* (28 accessions),



220 *U. maxima* (13 accessions), “agamic group 1” (54 accessions from the three remaining  
221 species) and a closely related “agamic group 2” (that corresponded with the “brizantha-1”  
222 subpopulation). Three samples obtained from USDA and identified simply as “*Urochloa* sp.”  
223 showed an admixture of these four groups and were annotated as “admixed”. Accession  
224 26438 (sample 86) was received as *U. humidicola*. Since it clustered with the *U. maxima*  
225 accessions, we reassigned it into that species. When we reduced the number of groups ( $K =$   
226 3), the *U. humidicola* and *U. maxima* species clustered together, but the agamic groups 1 and  
227 2 were consistent (Suppl. Figure 2). When we increased the number of groups ( $K = 5$ ), a new  
228 group split from the “agamic group 1” (that corresponded with the “brizantha-2”  
229 subpopulation). The twenty-eight accessions in the *U. humidicola* group had a basic  
230 chromosome number of 9 and high ploidy levels ranging from 6 to 9. The twelve accessions  
231 in the *U. maxima* group had a basic chromosome number of 8 and are tetraploid. The 67  
232 accessions in the agamic groups had a basic chromosome number of 9 and ploidy levels  
233 ranging from 2 to 6 (Tomaszewska et al., 2021b).

234

235 The admixture analysis was subsequently carried out using only the 67 accessions in the  
236 agamic group (Fig. 3B). An estimation of six groups ( $K = 6$ ) was selected based on the CV  
237 error (Suppl. Fig. 1B) and population structure (Fig. 4). A minimum threshold of 70 % shared  
238 genetic composition was used to assign accessions to each of the six groups. As shown in  
239 fig. 3B, the group “ruzizensis” was composed of all eleven *U. ruzizensis* accessions. It  
240 included one accession wrongly classified as *U. decumbens*. Within it, five samples showed  
241 shared ancestry (1-25%) with diploid *U. decumbens*. All seven diploid *U. decumbens*  
242 accessions composed the group “decumbens-P2” and were pure accessions with no shared  
243 ancestry with any other group. Similarly, ten tetraploid *U. decumbens* formed the group  
244 “decumbens-P4” with pure accessions with no shared ancestry with any other group.  
245 However, another six tetraploid *U. decumbens* composed a different group together with five  
246 *U. brizantha* accessions, which was called “decumbens/brizantha”. This group of eleven  
247 accessions was the only one composed by more than one species. Despite this mix, these

248 accessions showed clear shared ancestry among them and no shared ancestry with any other  
249 group (except two samples with minor components). Finally, the group “brizantha-1” and  
250 “brizantha-2” were formed by eight and thirteen *U. brizantha* accessions, respectively. The  
251 group “brizantha-2” has pure accessions with no shared ancestry with other groups (with one  
252 minor exception under 5%); while most samples in “brizantha-1” have shared ancestry with  
253 “decumbens-P4”. The group “brizantha-1” corresponds to the previous “agamic group 2”. The  
254 “brizantha-2” subpopulation was only observed in Ethiopia, while “brizantha-1” was observed  
255 in a broad range of latitudes. When we reduced the number of groups ( $K = 5$ ), the “brizantha-  
256 decumbens” merged with the “decumbens-P4”. When we increased the number of groups ( $K$   
257 = 7), five “brizantha-1” split into an independent subpopulation (Suppl. Fig. 3).

258  
259 The admixture analysis was finally completed using only the twenty-eight *U. humidicola*  
260 accessions (Fig. 3C). An estimation of two groups ( $K = 2$ ) was selected based on the CV error  
261 (Suppl. Fig. 1C) and population structure (Fig. 4). A minimum threshold of 70 % shared genetic  
262 composition was used to assign accessions to a group. The twenty-eight samples into the two  
263 groups: 23 accessions into “humidicola-1” and four accessions into “humidicola-2”. Accession  
264 16878 was an equal mixed from both *U. humidicola* groups and annotated as “humidicola-  
265 admixed”. When we increased the number of groups ( $K = 3$  and  $K = 4$ ), we obtained a small  
266 subpopulation with the accessions with higher admixture (16878 and 26155) and an artificial  
267 split with some “humidicola-1” accessions in an additional group (Suppl. Fig. 4).

268  
269 A smaller number of thirteen *U. maxima* accessions showed little genetic diversity compared  
270 to the other species. Because of the low diversity, we assigned all the *U. maxima* to a single  
271 subpopulation, named “maxima”.

272

### 273 **Population structure by principal component analysis**

274 A principal component analysis (PCA) showed the relationship between the 111 accessions,  
275 species and admixture groups (Fig. 4A and 4C). The PCA was also done for the 67 accessions

276 in the agamic group alone (Fig. 4B and 4D). The PCA analysis allowed us to define 12 clusters  
277 in total, which easily corresponded with the 10 subpopulations and two admixed groups. The  
278 distribution of accessions into subpopulations according to the species and ploidy annotations  
279 is represented in figure 5.

280

281 All subpopulations contained accessions from a single species, except subpopulation  
282 “decumbens/brizantha”. Remarkably, this subpopulation contained samples that showed  
283 greater similarity to each other -in spite of species- than to accessions from the same species  
284 in different subpopulations. The two diploid subpopulations, “decumbens-P2” and “ruzizensis”  
285 clustered together and apart from polyploid subpopulations. Subpopulation “brizantha-1” was  
286 more distant to other agamic subpopulations than “brizantha-2” despite accessions in  
287 “brizantha-1” showed shared admixture with tetraploid *U. decumbens*, while accessions in  
288 “brizantha-2” did not.

289

290 Two groups of accessions contained hybrids, one containing hybrids between the distant  
291 *Urochloa* species (“admixed” subpopulation) and another contained hybrids within the three  
292 species in the agamic group (“agamic-admixed”), which readily interbreed in control  
293 conditions.

294

## 295 **DISCUSSION**

296 We clarified the relationship between the gene pools from five *Urochloa* spp. that are used in  
297 the development of commercial forage cultivars. By using RNA-seq, we leveraged in an  
298 unprecedented number of markers, over 1.1M SNPs, that virtually encompassed the complete  
299 transcriptome from the accessions based on the total genome length covered by the reads (~  
300 269 Mbp or 37 % of the genome). We obtained a median of 69 and 13 SNP sites per gene  
301 and exon, respectively, which makes this dataset a valuable resource for breeders and  
302 researchers (e.g. to design screening markers). The greater length compared to the annotated  
303 gene models (Worthington et al., 2021) was probably because the later only used

304 transcriptomic data from *U. ruzizensis*. However compared with our dataset, that  
305 transcriptomic data was from multiple tissues and included stress conditions. The genus  
306 *Urochloa* includes species previously classified under other taxonomic groups. We have opted  
307 to annotate all as *Urochloa* supported by recent work (Tomaszewska et al., 2021b). E.g., we  
308 did observed the same distance between *U. maxima* and the agamic group than between *U.*  
309 *humidicola* and the agamic group.

310

311 We observed two subpopulations of *U. brizantha*, two subpopulations of *U. decumbens*, and  
312 one subpopulation with accessions from both *U. brizantha* and *U. decumbens*. The two *U.*  
313 *decumbens* subpopulations were divided by ploidy. Diploid *U. decumbens* clustered with *U.*  
314 *ruzizensis*, while tetraploid *U. decumbens* clustered with *U. brizantha*. This split in two *U.*  
315 *decumbens* subpopulations by ploidy was previously reported using microsatellites (Triviño et  
316 al., 2017). In previous studies, the relation of *U. decumbens* with the other two species has  
317 been discussed, as it was alternatively found closely related to *U. ruzizensis* (Ferreira et al.,  
318 2016) or *U. brizantha* (Ambiel et al., 2008). In fact, both observations were correct depending  
319 on the ploidy of the accessions under consideration.

320

321 Based on our results, *U. brizantha* diversity is complex and divided in several gene pools. A  
322 group of eleven *U. brizantha* accessions was different enough to the rest of the agamic group  
323 to form an independent cluster (“agamic group 2”; Fig. 3A and 4A). This group of eleven  
324 accessions later formed the subpopulation “brizantha-1”. Despite of “brizantha-1” being  
325 distant, we observed admixture between “brizantha-1” and “decumbens-P4”, “brizantha-2”  
326 and “decumbens/brizantha” subpopulations (Fig. 3B). Among the possible evolutive scenarios  
327 that would explain the multiple shared ancestry in “brizantha-1” despite being more distant,  
328 previous studies have proposed a single polyploidization event taking place to establish both  
329 the tetraploid *U. brizantha* and *U. decumbens* (Pessoa-Filho et al., 2017, Tomaszewska et al.,  
330 2021b). The “brizantha-1” subpopulation was observed in a broad range of latitudes (e.g. in  
331 Ethiopia and Zimbabwe), while “brizantha-2” was only observed in Ethiopia.

332

333 We obtained a subpopulation, named “decumbens/brizantha”, that included an almost equal  
334 number of *U. decumbens* and *U. brizantha* accessions. This is the only subpopulation with  
335 more than one species, and most accessions did not show shared ancestry with the other  
336 subpopulations from either of these species (Fig. 3B). Furthermore, the PCA also showed  
337 “decumbens/brizantha” clustered independently to other groups (in the top right corner of Fig.  
338 4D). Remarkably, the “decumbens/brizantha” merged with the “decumbens-P4” when we did  
339 the admixture analysis with less subpopulations ( $K = 5$ ). At the same time, two accessions  
340 (16173 and PI226049) shared ancestry with “brizantha-2” and were situated between the  
341 subpopulations “decumbens/brizantha” and “brizantha-2” in the PCA (Fig. 4D). Consequently,  
342 we concluded “decumbens/brizantha” cannot be merged with either “decumbens-P4” or  
343 “brizantha-2”, but on the contrary, evidence supported it is an independent subpopulation.

344

345 Vigna et al. (2011b) observed three clusters in *U. brizantha* after evaluating 172 accessions  
346 from EMBRAPA’s collection (so resulting from the same field work in 1980s than our dataset)  
347 using 20 SSR markers. Eleven accessions are common between both studies, and our  
348 subpopulations “brizantha-1” and “brizantha-2” corresponded with clusters II and I,  
349 respectively (Vigna et al., 2011b). Notably, their cluster III appears to include additional  
350 “brizantha-1” and “brizantha-2” accessions (16122, 16480), so does not correspond with our  
351 “decumbens-brizantha” subpopulation. Triviño et al. (2017) did not discussed a division among  
352 *U. brizantha* accessions, but included a tree resulting from UPGMA clustering based on 39  
353 microsatellites that would also support at least two gene pools in *U. brizantha*.

354

355 In the centre of the agamic group, we identified the “agamic-admixed” accessions (Fig. 4D).  
356 This cluster of accessions included hybrid accessions resulting from interspecific species  
357 within the agamic group, and should not be confused with the “admixed” accessions (Fig. 4C),  
358 which resulted from crosses between more distant *Urochloa* species. Our analysis supports  
359 that the “agamic-admixed” are either progeny from crosses between *U. decumbens* and either

360 *U. decumbens* or *U. brizantha* (16505, PI210724, PI292187); or between *U. ruziziensis* and  
361 either *U. decumbens* or *U. brizantha* (26175, 16494, 26110, 1752).

362

363 *U. maxima* is also known as *Panicum maximum* or *Megathyrsus maximus*. All *U. maxima*  
364 accessions (including accession 26438, which was incorrectly annotated as *U. humidicola*)  
365 showed very limited diversity (Fig. 4) and were assigned to a single subpopulation (“maxima”).  
366 This could reflect lower diversity in the species, or be a consequence of original collection and  
367 sampling strategy, but it suggests there would be limited gains from including multiple  
368 accessions from our study in breeding programmes.

369

370 We observed two different subpopulations in *U. humidicola*, named “humidicola-1” and  
371 “humidicola-2”, plus a single accession (16878) that was an equal mix from both  
372 subpopulations. In the initial admixture analysis with all the 111 accessions (Fig. 3A), the  
373 “humidicola-2” and “humidicola-admixed” accessions had shared ancestry to the “agamic  
374 group 1”, while the “humidicola-1” did not. Triviño et al. (2017) also observed a large group of  
375 *U. humidicola* accessions including all but three of their accessions. These three distant *U.*  
376 *humidicola* accessions were 675, 679 and 26146. Accession 679 is a “humidicola-2”  
377 subpopulation in our study. Remarkably, 26146 is the sexual *U. humidicola* accession that  
378 allowed the establishment of breeding programmes in mid-2000s, and combining the results  
379 from both studies supports that the sexual 26146 accession is likely a “humidicola-2”  
380 accession. We only had collection information for one “humidicola-2” accession, but it was  
381 close to a “humidicola-1” accession, so it is not likely a geographical division. Vigna et al.  
382 (2011a) analysed 26 *U. humidicola* accessions and used UPGMA clustering based on 38  
383 microsatellites to divide *U. humidicola* in two branches in the resulting tree. All seven common  
384 accessions with our study were “humidicola-1” and appeared in the top branch of the tree. The  
385 bottom branch may be “humidicola-2”, since it included the sexual accession 26146, one  
386 accession (26149) not sequenced in our dataset, and the progeny from their crossing. On the  
387 other hand, two studies from the same group (Jungmann et al., 2010, Vigna et al., 2011a)

388 identified five clusters in *U. humidicola* accessions using ~ 50 SSR markers. While multiple  
389 accessions were common to both studies, we did not find correlation between our results and  
390 the five clusters; i.e. “humidicola-1” accessions were evenly divided among the multiple  
391 clusters. In a similar conclusion, when we increased the number of tentative *U. humidicola*  
392 subpopulations (K = 3 and K = 4), we found the additional groups to be artificial splits from  
393 “humidicola-1” and not supported by the PCA.

394

## 395 **CONCLUSION**

396 We clarified the relationship between the gene pools from five *Urochloa* spp. that are used in  
397 the development of commercial forage cultivars in different countries. We identified ten  
398 subpopulations in total, which had no relation with geographical collection, and represent ten  
399 independent gene pools (excluding the two admixed subpopulations). Our results support the  
400 division in *U. decumbens* by ploidy, with a diploid subpopulation closely related to *U.*  
401 *ruziziensis*, and a tetraploid subpopulation closely related to *U. brizantha*. We observed clearly  
402 differentiated gene pools in *U. brizantha*, which were not related with origin or ploidy. One of  
403 these gene pools, named “brizantha-1”, clustered relatively distant to the rest of the agamic  
404 accessions despite having significant shared ancestry with tetraploid *U. decumbens*. Among  
405 the possible evolutive scenarios to explain this observation, it would support a single  
406 polyploidization event taking place to establish both the tetraploid *U. brizantha* and *U.*  
407 *decumbens*. The “brizantha-1” gene pool should be further explored for prospective founders  
408 in the agamic group since *U. brizantha* is particularly tolerant to neotropical insects, which is  
409 one of the main traits under selection. We also identified a well-supported subpopulation  
410 containing both polyploid *U. decumbens* and *U. brizantha* accessions that likely constitutes a  
411 third independent gene pool for both species. We observed two gene pools in *U. humidicola*.  
412 One subpopulation, “humidicola-2”, was significantly smaller but likely includes the only known  
413 sexual accession. We also observed one case of natural hybridization between both *U.*  
414 *humidicola* groups. Our results offer a definitive picture of the available diversity and resolve  
415 questions raised by previous studies. They provide an insight into the diversity available for

416 improvement through crossing, and a platform to identify target genes for forage grass  
417 improvement, also providing gene sequences to allow for genome editing (CRISPR/Cas9)  
418 approaches. Furthermore, as performance data become available, the data could be further  
419 leveraged for GWAS (Genome Wide Association Studies), genotyping array construction, and  
420 development of genetic markers for selection in breeding programmes.

421

#### 422 **AUTHOR CONTRIBUTIONS**

423 JJDV, RACM, JT, TS and JSHH conceived and managed the project. JH and JJDV completed  
424 the bioinformatics analysis. PT analysed and provided ploidy level and accessions  
425 information. TKP, VC and JA selected, validated and collected the samples. TKP carried out  
426 RNA extraction. JH and JJDV wrote the manuscript with contributions from all the authors.

427

#### 428 **ACKNOWLEDGEMENTS**

429 This work was supported under the RCUK-CIAT Newton-Caldas Initiative “Exploiting  
430 biodiversity in *Brachiaria* and *Panicum* tropical forage grasses using genetics to improve  
431 livelihoods and sustainability”, with funding from UK’s Official Development Assistance  
432 Newton Fund awarded by UK Biotechnology and Biological Sciences Research Council  
433 (BB/R022828/1). Additional funding for this study was received from the CGIAR Research  
434 Programmes on Livestock; and Climate Change, Agriculture and Food Security (CCAFS). JH  
435 and JJDV received additional funding from the Biotechnology and Biology Sciences Research  
436 Council (BBSRC)’s Global Challenge Research Fund (Project BB/P028098/1) and core  
437 strategic funding (Project BBS/E/T/000PR9818).

438 We are grateful to CIAT’s Genebank and USDA’s Germplasm Resources Information Network  
439 (GRIN) for their generous provision of germplasm. Germplasm held in the CIAT and USDA  
440 collections is available on request.

441

#### 442 **DATA AVAILABILITY**

443 All the raw reads were deposited in SRA under Bioproject PRJNA513453.



444

445 **CONFLICT OF INTEREST**

446 The authors declare no conflict of interest.

447

448 **REFERENCES**

449 **Alexander DH, Lange K. 2011.** Enhancements to the ADMIXTURE algorithm for individual  
450 ancestry estimation. *BMC Bioinformatics*, **12**: 246.

451 **Ali N, Heslop-Harrison JP, Ahmad H, Graybosch RA, Hein GL, Schwarzacher T. 2016.**  
452 Introgression of chromosome segments from multiple alien species in wheat  
453 breeding lines with wheat streak mosaic virus resistance. *Heredity*, **117**: 114-123.

454 **Ambiel AC, Guaberto LM, Vanderlei TM, Machado Neto NB. 2008.** Agrupamento de  
455 acessos e cultivares de três espécies de *Brachiaria* por RAPD. *Acta Scientiarum*.  
456 *Agronomy*, **30**: 457-464.

457 **Bradbury PJ, Zhang Z, Kroon DE, Casstevens TM, Ramdoss Y, Buckler ES. 2007.**  
458 TASSEL: software for association mapping of complex traits in diverse samples.  
459 *Bioinformatics*, **23**: 2633-5.

460 **Burton W, Ripley V, Potts D, Salisbury P. 2004.** Assessment of genetic diversity in  
461 selected breeding lines and cultivars of canola quality *Brassica juncea* and their  
462 implications for canola breeding. *Euphytica*, **136**: 181-192.

463 **Do Valle Cd, Savidan Y. 1996.** Genetics, cytogenetics, and reproductive biology of  
464 *Brachiaria*. *Brachiaria: biology, agronomy, and improvement*: 147-163.

465 **Dobin A, Davis CA, Schlesinger F, Drenkow J, Zaleski C, Jha S, Batut P, Chaisson M,**  
466 **Gingeras TR. 2013.** STAR: ultrafast universal RNA-seq aligner. *Bioinformatics*, **29**:  
467 15-21.

468 **Ferreira RC, Caçado LJ, do Valle CB, Chiari L, de Souza AP. 2016.** Microsatellite loci  
469 for *Urochloa decumbens* (Stapf) R.D. Webster and cross-amplification in other  
470 *Urochloa* species. *BMC Res Notes*, **9**: 152.

- 471 **Francis RM. 2017.** pophelper: an R package and web app to analyse and  
472 visualize population structure. *Mol Ecol Resour*, **17**: 27-32.
- 473 **Gale MD, Miller T. 1987.** The introduction of alien genetic variation in wheat. *Wheat*  
474 *breeding*: Springer.
- 475 **Gracindo CV, Louvandini H, Riet-Correa F, Barbosa-Ferreira M, Castro MB. 2014.**  
476 Performance of sheep grazing in pastures of *Brachiaria decumbens*, *Brachiaria*  
477 *brizantha*, *Panicum maximum*, and *Andropogon gayanus* with different protodioscin  
478 concentrations. *Trop Anim Health Prod*, **46**: 733-7.
- 479 **Hanley S, Pellny T, de Vega J, Castiblanco V, Arango J, Eastmond P, Heslop-Harrison**  
480 **J, Mitchell R. 2020.** Allele Mining in Diverse Accessions of *Urochloa* and  
481 *Megathyrsus* spp. Tropical Grasses to Improve Forage Quality and Reduce  
482 Environmental Impact. *bioRxiv*: 2020.12.09.418087.
- 483 **Jank L, Barrios SC, do Valle CB, Simeão RM, Alves GF. 2014.** The value of improved  
484 pastures to Brazilian beef production. *Crop and Pasture Science*, **65**: 1132-1137.
- 485 **Jungmann L, Vigna BB, Boldrini KR, Sousa AC, do Valle CB, Resende RM, Pagliarini**  
486 **MS, Zucchi MI, de Souza AP. 2010.** Genetic diversity and population structure  
487 analysis of the tropical pasture grass *Brachiaria humidicola* based on microsatellites,  
488 cytogenetics, morphological traits, and geographical origin. *Genome*, **53**: 698-709.
- 489 **Keller-Grein G, Maass B, Hanson J. 1996.** Natural variation in *Brachiaria* and existing  
490 germplasm collections. *Brachiaria: biology, agronomy, and improvement*, **45**: 16-42.
- 491 **Kellogg EA. 2015.** *Flowering plants. Monocots: Poaceae*: Springer.
- 492 **Krueger F. 2015.** Trim galore. A wrapper tool around Cutadapt and FastQC to consistently  
493 apply quality and adapter trimming to FastQ files, **516**: 517.
- 494 **Lutts S, Ndikumana J, Louant B. 1991.** Fertility of *Brachiaria ruziziensis* in interspecific  
495 crosses with *Brachiaria decumbens* and *Brachiaria brizantha*: meiotic behaviour,  
496 pollen viability and seed set. *Euphytica*, **57**: 267-274.
- 497 **Maass BL, Midega CA, Mutimura M, Rahetlah VB, Salgado P, Kabirizi JM, Khan ZR,**  
498 **Ghimire SR, Rao IM. 2015.** Homecoming of *Brachiaria*: Improved hybrids prove

- 499 useful for African animal agriculture. *East African Agricultural and Forestry Journal*,  
500 **81**: 71-78.
- 501 **Mendes-Bonato AB, Junqueira Filho RG, Pagliarini MS, Do Valle CB, de Oliveira**  
502 **Penteado MI. 2002.** Unusual cytological patterns of microsporogenesis in *Brachiaria*  
503 *decumbens*: abnormalities in spindle and defective cytokinesis causing precocious  
504 cellularization. *Cell Biology International*, **26**: 641-646.
- 505 **Miles JW. 2007.** Apomixis for cultivar development in tropical forage grasses. *Crop Science*,  
506 **47**: S-238-S-249.
- 507 **Miles JW, Cardona C, Sotelo G. 2006.** Recurrent selection in a synthetic brachiariagrass  
508 population improves resistance to three spittlebug species. *Crop Science*, **46**: 1088-  
509 1093.
- 510 **Penteado MdO, dos Santos A, Rodrigues IF, do Valle C, Seixas MAC, Esteves A. 2000.**  
511 Determinação de ploidia e avaliação da quantidade de DNA total em diferentes  
512 espécies do gênero *Brachiaria*. *Embrapa Gado de Corte-Boletim de Pesquisa e*  
513 *Desenvolvimento (INFOTECA-E)*.
- 514 **Pessoa-Filho M, Martins AM, Ferreira ME. 2017.** Molecular dating of phylogenetic  
515 divergence between *Urochloa* species based on complete chloroplast genomes.  
516 *BMC Genomics*, **18**: 516.
- 517 **Renvoize S, Clayton W, Kabuye C, Miles J, Maass B, Valle C. 1996.** *Brachiaria*: biology,  
518 agronomy, and improvement. *Morphology, Taxonomy, and Natural Distribution of*  
519 *Brachiaria (Trin.) Griseb*: 1-15.
- 520 **Tomaszewska P, Pellny TK, Hernández LM, Mitchell RAC, Castiblanco V, de Vega JJ,**  
521 **Schwarzacher T, Heslop-Harrison P. 2021a.** Flow Cytometry-Based Determination  
522 of Ploidy from Dried Leaf Specimens in Genomically Complex Collections of the  
523 Tropical Forage Grass *Urochloa* s. l. *Genes*, **12**: 957.
- 524 **Tomaszewska P, Vorontsova MS, Renvoize SA, Ficinski SZ, Tohme J, Schwarzacher**  
525 **T, Castiblanco V, de Vega JJ, Mitchell RA, Heslop-Harrison P. 2021b.** Complex  
526 polyploid and hybrid species in an apomictic and sexual tropical forage grass group:

- 527 genomic composition and evolution in *Urochloa* (*Brachiaria*) species. *bioRxiv*,  
528 2021.02.19.431966.
- 529 **Torres González AM, Morton CM. 2005.** Molecular and morphological phylogenetic  
530 analysis of *Brachiaria* and *Urochloa* (Poaceae). *Mol Phylogenet Evol*, **37**: 36-44.
- 531 **Triviño NJ, Perez JG, Recio ME, Ebina M, Yamanaka N, Tsuruta S-i, Ishitani M,**  
532 **Worthington M. 2017.** Genetic Diversity and Population Structure of *Brachiaria*  
533 Species and Breeding Populations. *Crop Science*, **57**: 2633-2644.
- 534 **Tsuruta S-i, Shimoda K, Kouki K, Ebina M. 2015.** The present status of C4 tropical  
535 grasses breeding and molecular approaches. *Japan Agricultural Research Quarterly:*  
536 *JARQ*, **49**: 203-215.
- 537 **Van der Auwera GA, Carneiro MO, Hartl C, Poplin R, Del Angel G, Levy-Moonshine A,**  
538 **Jordan T, Shakir K, Roazen D, Thibault J, Banks E, Garimella KV, Altshuler D,**  
539 **Gabriel S, DePristo MA. 2013.** From FastQ data to high confidence variant calls: the  
540 Genome Analysis Toolkit best practices pipeline. *Curr Protoc Bioinformatics*, **43**:  
541 11.10.1-11.10.33.
- 542 **Vigna BB, Alleoni GC, Jungmann L, do Valle CB, de Souza AP. 2011a.** New  
543 microsatellite markers developed from *Urochloa humidicola* (Poaceae) and cross  
544 amplification in different *Urochloa* species. *BMC Res Notes*, **4**: 523.
- 545 **Vigna BBZ, Jungmann L, Francisco PM, Zucchi MI, do Valle CB, de Souza AP. 2011b.**  
546 Genetic diversity and population structure of the *Brachiaria brizantha* germplasm.  
547 *Tropical Plant Biology*, **4**: 157-169.
- 548 **Worthington M, Miles JW. 2015.** Reciprocal full-sib recurrent selection and tools for  
549 accelerating genetic gain in apomictic *Brachiaria*. *Molecular breeding of forage and*  
550 *turf*. Springer.
- 551 **Worthington M, Perez JG, Mussurova S, Silva-Cordoba A, Castiblanco V, Cardoso**  
552 **Arango JA, Jones C, Fernandez-Fuentes N, Skot L, Dyer S, Tohme J, Di Palma**  
553 **F, Arango J, Armstead I, De Vega JJ. 2021.** A new genome allows the identification

554 of genes associated with natural variation in aluminium tolerance in *Brachiaria*  
555 grasses. *J Exp Bot*, **72**: 302-319.  
556  
557

558 Table 1: Summary of the species (rows) and ploidy level (columns) of the 111 accessions  
559 used in this study. Details about each accession were included in Suppl. Table 1.

|                      | 2n | 4n | 5n | 6n | 7n | 8n/9n | ?  | Total |
|----------------------|----|----|----|----|----|-------|----|-------|
| <i>U. ruzizensis</i> | 10 |    |    |    |    |       | 1  | 11    |
| <i>U. decumbens</i>  | 8  | 17 |    |    |    |       | 1  | 26    |
| <i>U. brizantha</i>  |    | 17 | 9  | 2  |    |       | 1  | 29    |
| <i>U. humidicola</i> |    |    |    | 10 | 16 | 2     |    | 28    |
| <i>U. maxima</i>     |    | 12 |    |    |    |       | 1* | 13    |
| <i>U. spp.</i>       |    | 2  | 1  |    |    |       | 1  | 4**   |

560 \*Accession 26438 was received as *U. humidicola* but it was reassigned to *U. maxima* based  
561 on the results. \*\*Accession 1752 (*U. spp.*) clustered within the agamic group.

562

563 Figure 1. Geographical origin of 92 accessions with collection coordinates (74 accessions) or  
564 country of origin (18 accessions). Accessions were coloured by subpopulation. (A) Origin in  
565 Sub-Saharan Africa. (B) Zoom into East Africa. (C) Zoom into the Great Lakes region.

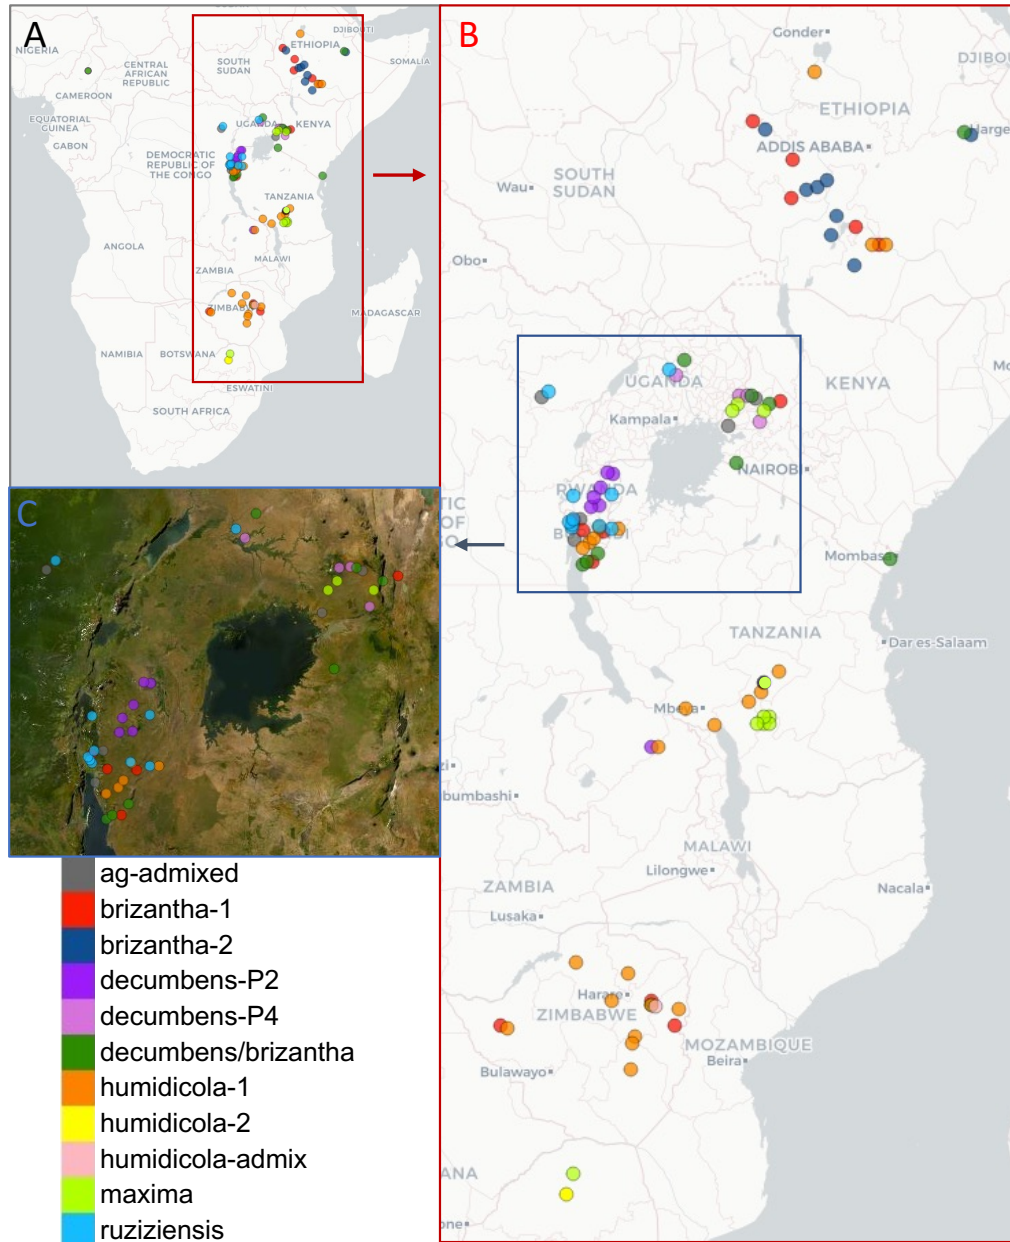

566

567 Figure 2. Percentage of reads aligning in either uniquely or in multiple positions in the genome.

568 The 111 accessions were coloured by species (A) or ploidy (B).

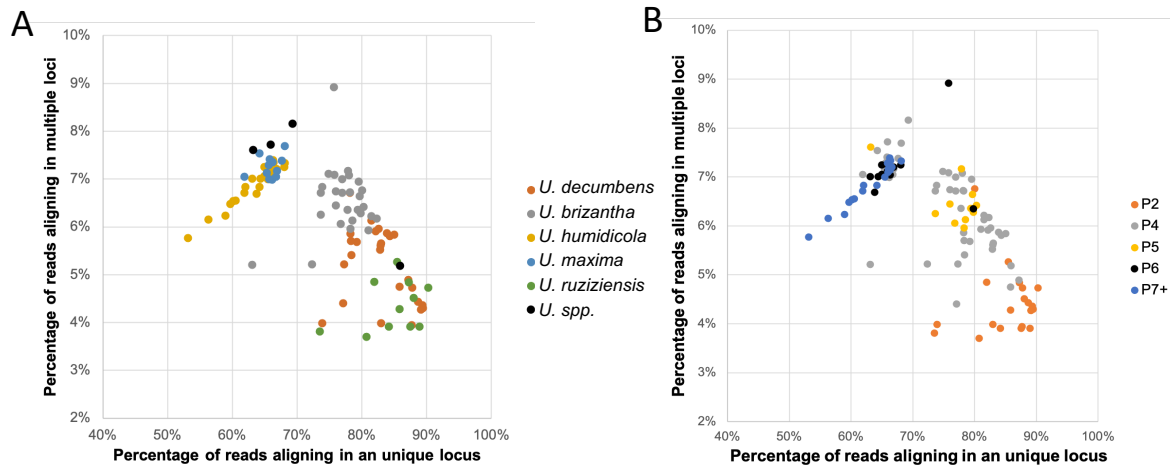

569



570 Figure 3. Admixture analysis of the genetic ancestry inferred in the complete set of 111  
 571 accessions (A), the subset of 67 accessions in the agamic group (B), and the subset of 28 *U.*  
 572 *humidicola* accessions (C). Ploidy level is included at the foot of each column. Each accession  
 573 is represented by a stack column partitioned by proportion of ancestral genetic component,  
 574 where each identified ancestral genetic component is represented with a different colour.  
 575 Accessions with a single colour are “pure”. A minimum threshold of 50 % (A) or 70 % (B and  
 576 C) genetic composition was used to assign accessions to groups. In panel C, “x” for  
 577 “humidicola-admix”.

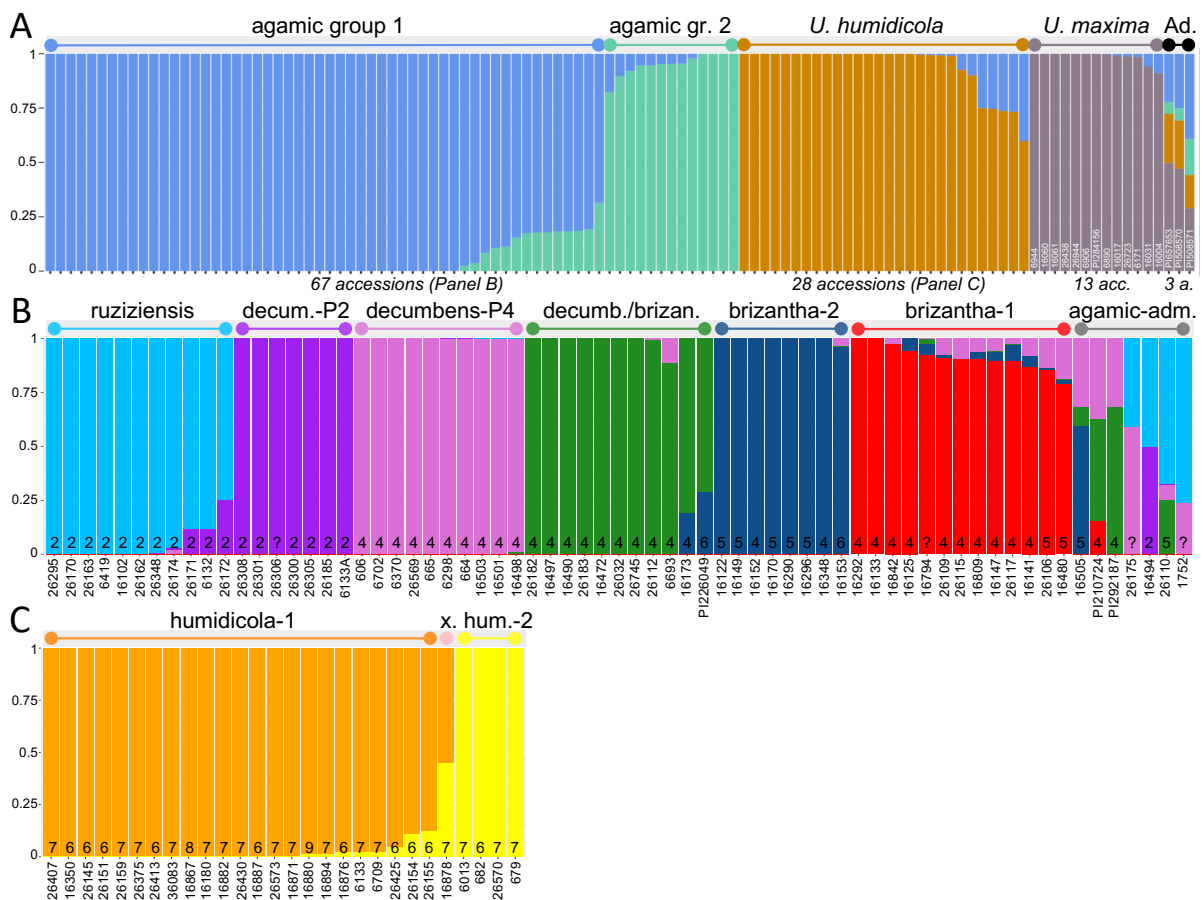

578

579

580 Figure 4. Population structure by Principal Component Analysis (PCA) using the top two  
 581 components to separate the complete set of 111 accessions (A and C) or the components 1  
 582 and 3 to separate the subset of 67 accessions in the agamic group (B and D). Accessions  
 583 were coloured by species (A and B) or subpopulation (C and D).

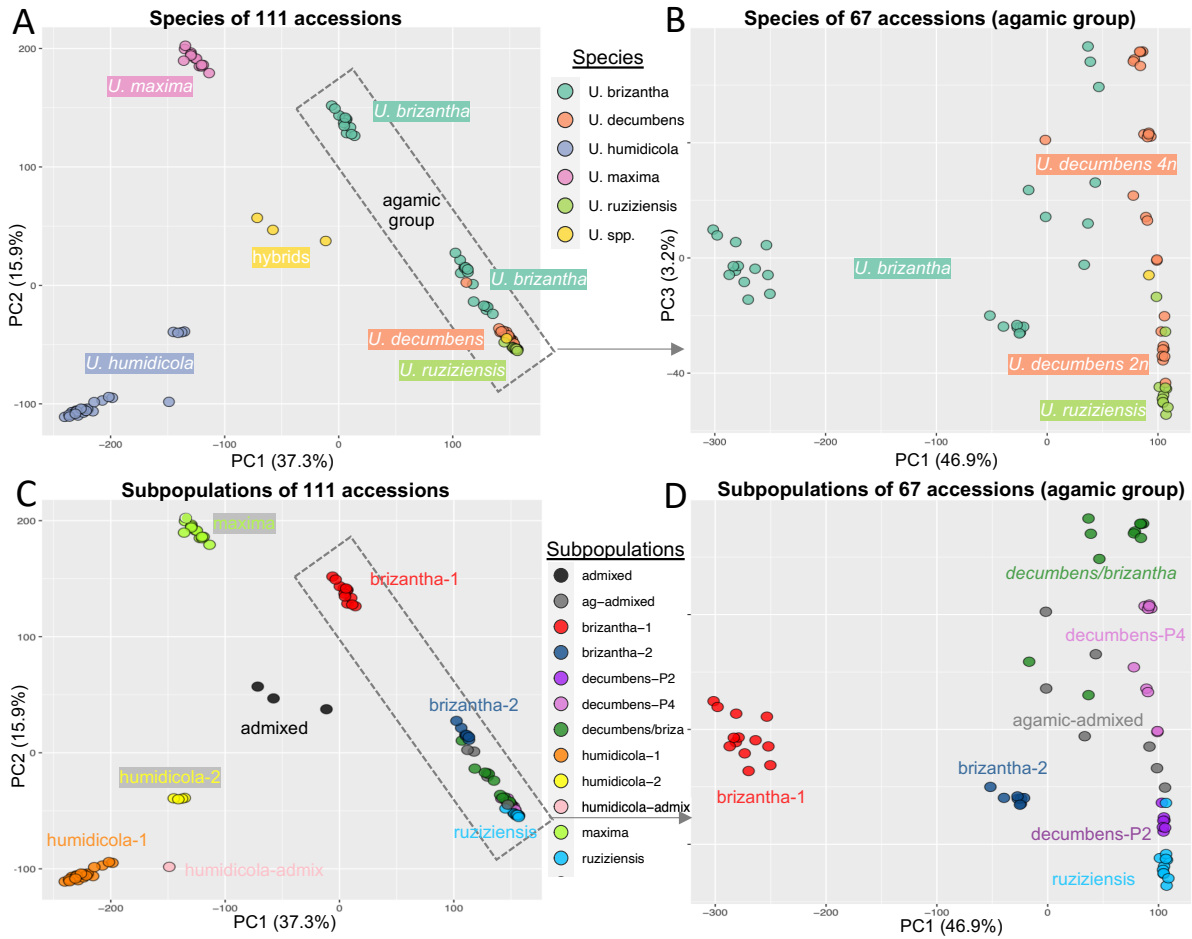

584

585

586 Figure 5: Distribution of accessions in subpopulations according to the species and ploidy  
 587 annotations. The number on each stream represents the number of accessions in that division.  
 588 Streams without a number represent a single accession.

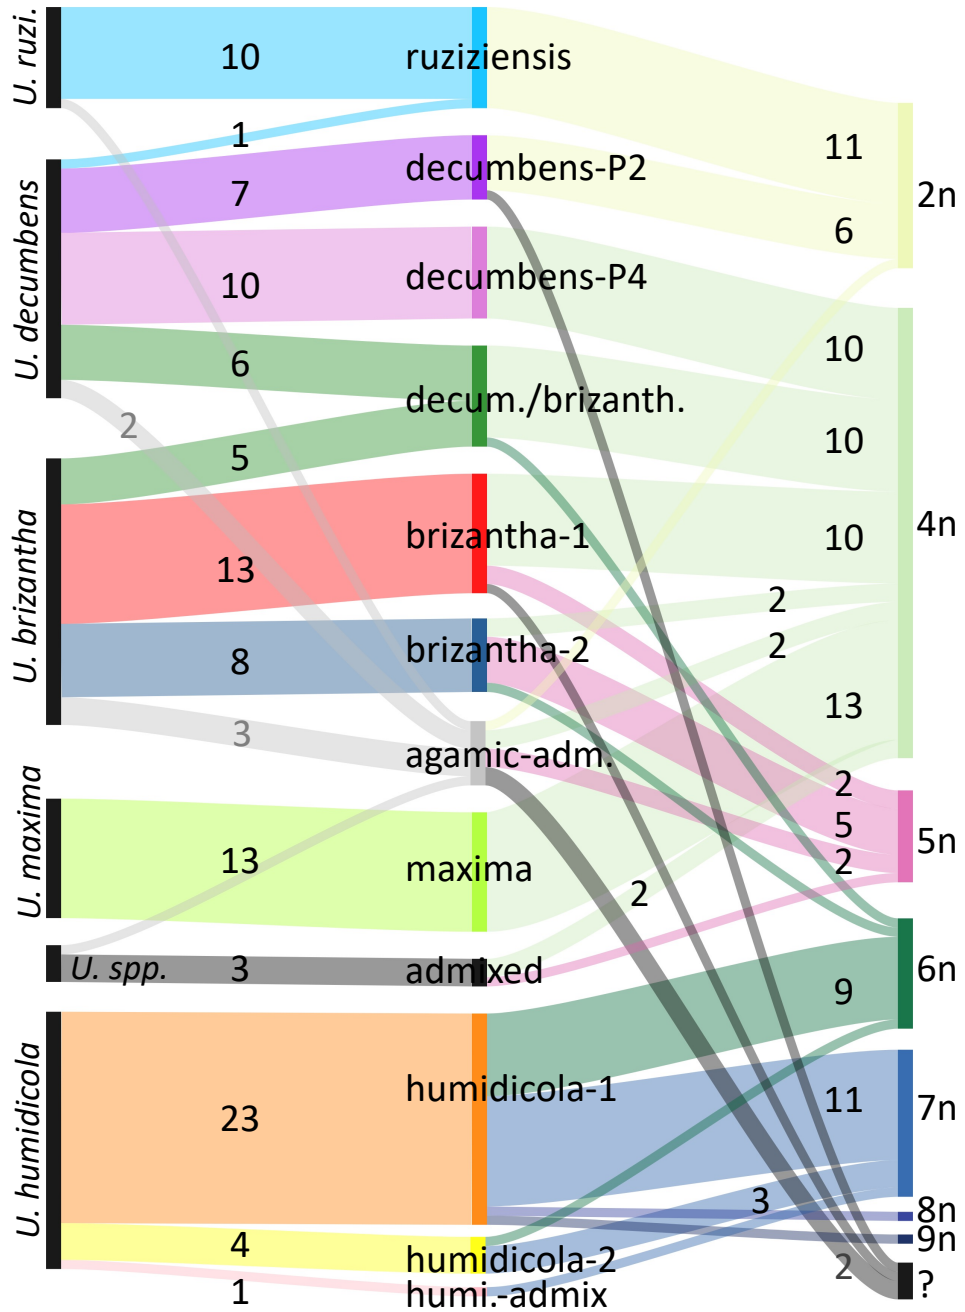

589

590

591 Supplementary Table 1. Sample number, accession number, species, ploidy, subpopulation,  
592 architecture, collection location, and PCA position for each of the 111 accessions used in this  
593 study.

594

595 Supplementary figure 1: Cross-validation (CV) error and chosen value for number of groups  
596 (K) for the complete dataset of 111 accessions (A), the subset of 67 accessions in the agamic  
597 group (B), and the subset of 28 *U. humidicola* accessions (C). Cross-validation error is shown  
598 on the Y-axis (vertical) and the number of hypothetical populations on the X-axis (horizontal).

599

600 Supplementary figure 2: Admixture analysis for alternative values for number of groups (K =  
601 3, 4 -selected-, and 5) in the complete set of 111 accessions. Numbered by "sample id".

602

603 Supplementary figure 3: Admixture analysis for alternative values for number of groups (K =  
604 5, 6 -selected-, and 7) in the subset of 67 accessions in the agamic group. Numbered by  
605 "sample id".

606

607 Supplementary figure 4: Admixture analysis for alternative values for number of groups (K =  
608 2 -selected, 3 and 4) in the subset of 28 *U. humidicola* accessions. Numbered by "sample id".
